# Supplementary material for: Aggregation-induced emission and reversible mechanochromic luminescence of carbazole-based triphenylacrylonitrile derivatives
Source: Royal Society of Chemistry journal article supplement (doi:10.1039/c6ra03310e), 2016-01-01
Supplement: c6ra03310e1.pdf [file c6ra03310e1.pdf]

**Supporting Information for:**

**Aggregation-induced emission and reversible mechanochromic luminescence of carbazole-based triphenylacrylonitrile derivatives**

Yong Zhan,<sup>\*a</sup> Peng Gong,<sup>b</sup> Peng Yang,<sup>a</sup> Zhe Jin,<sup>a</sup> Ying Bao,<sup>a</sup> Ying Li,<sup>a</sup> Yongnan

Xu.<sup>\*a</sup>

<sup>a</sup> *Key Laboratory of Structure-Based Drug Design and Discovery, Shenyang*

*Pharmaceutical University, Ministry of Education, Shenyang, 110016, P. R. China*

<sup>b</sup> *State Key Laboratory of Supramolecular Structure and Materials, College of*

*Chemistry, Jilin University, Changchun, 130012, P. R. China.*

E-mail: [zhanyong2046@126.com](mailto:zhanyong2046@126.com).

Tel: +86-024-23986449

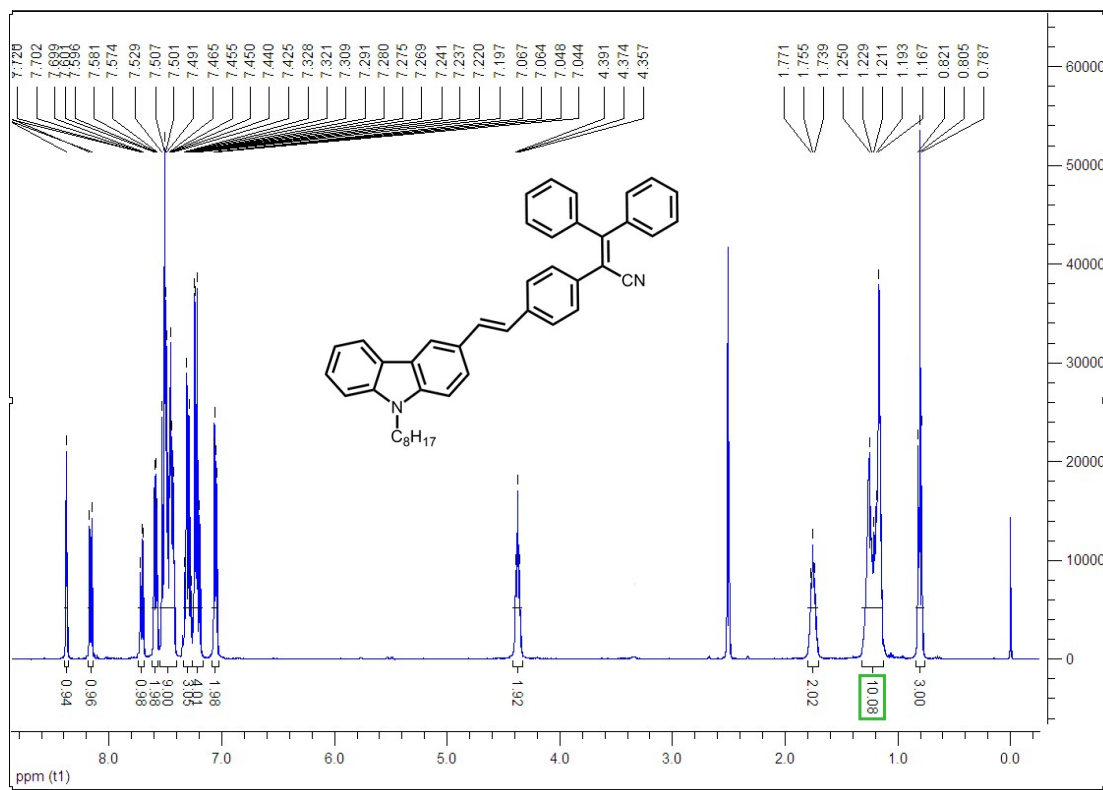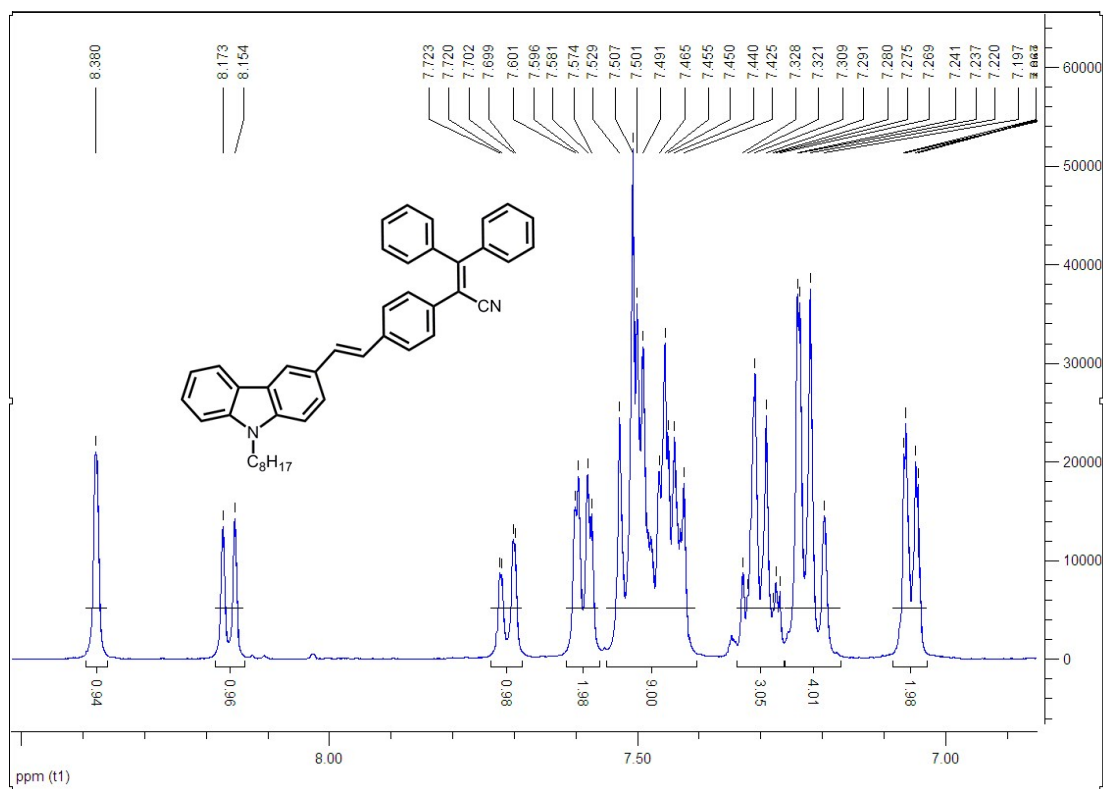

**Fig. S1**  $^1\text{H-NMR}$  (400 MHz,  $\text{DMSO-d}_6$ ) spectra of compound **Cz1-TPAN**.

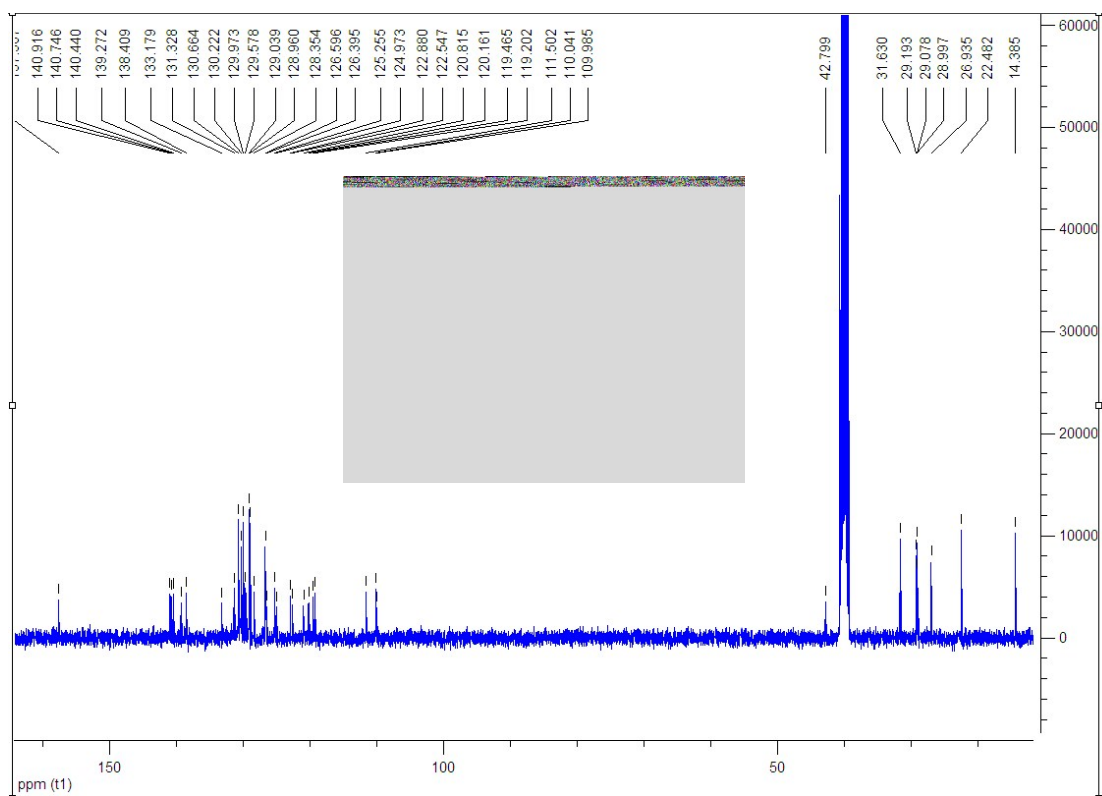

**Fig. S2**  $^{13}\text{C-NMR}$  (100 MHz,  $\text{DMSO-d}_6$ ) spectrum of compound **Cz1-TPAN**.

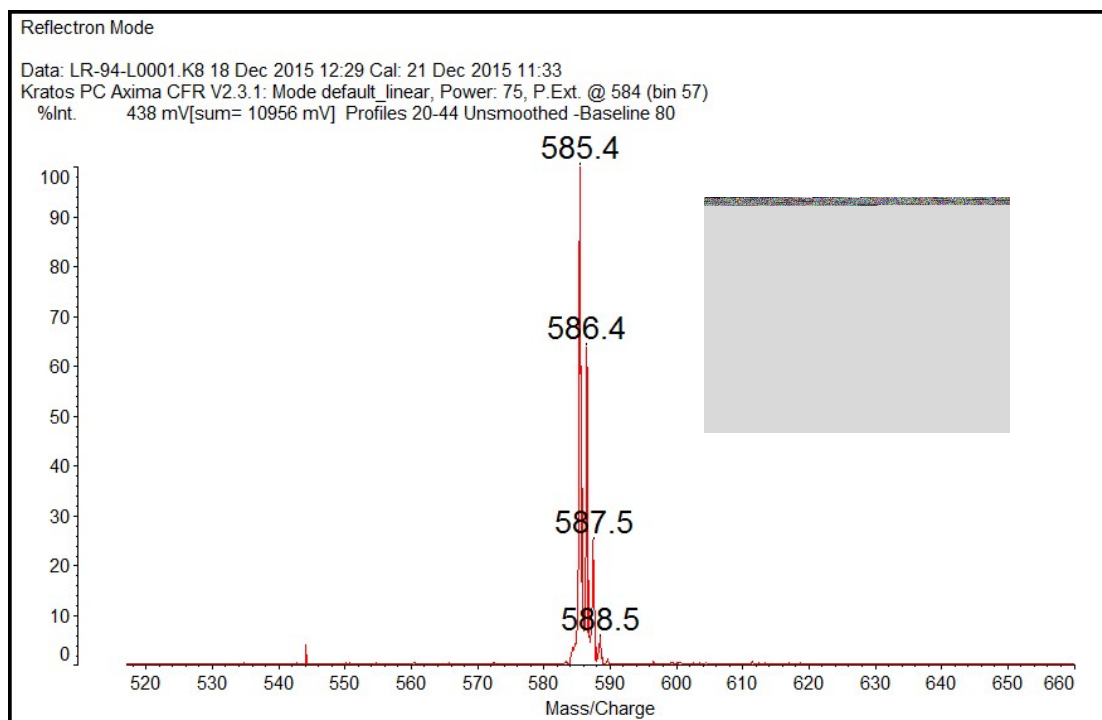

**Fig. S3** The MALDI/TOF MS spectrum of compound **Cz1-TPAN**.

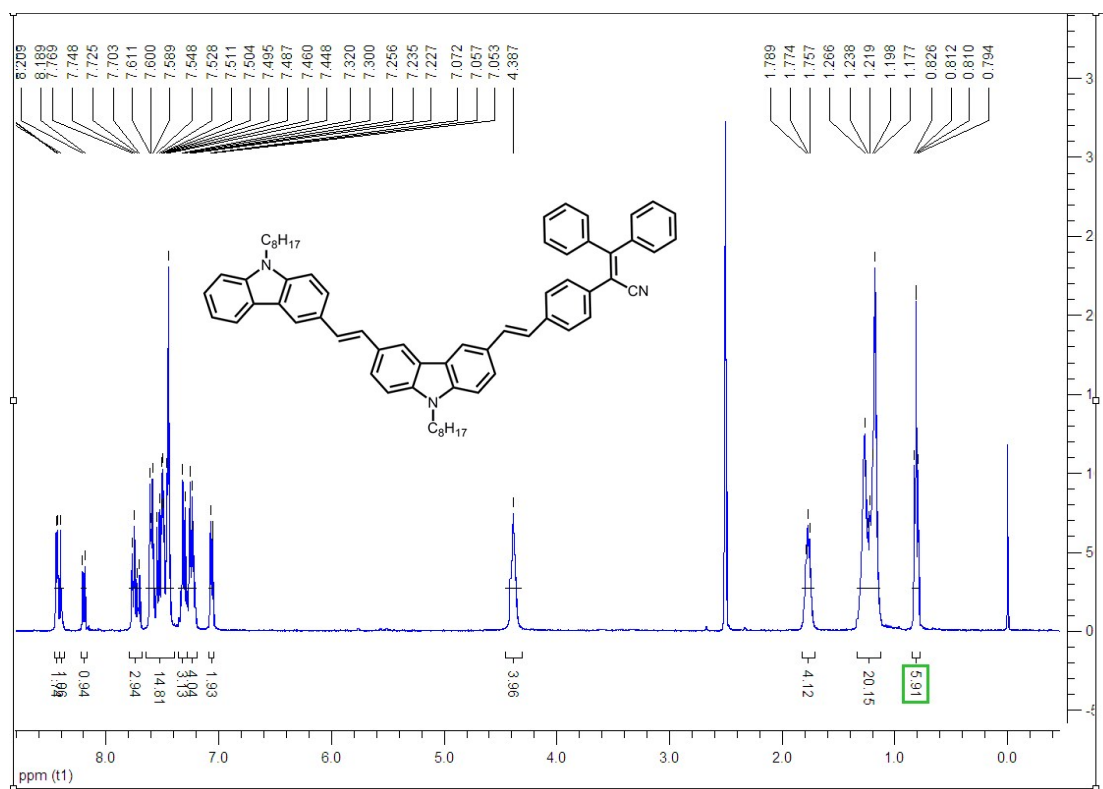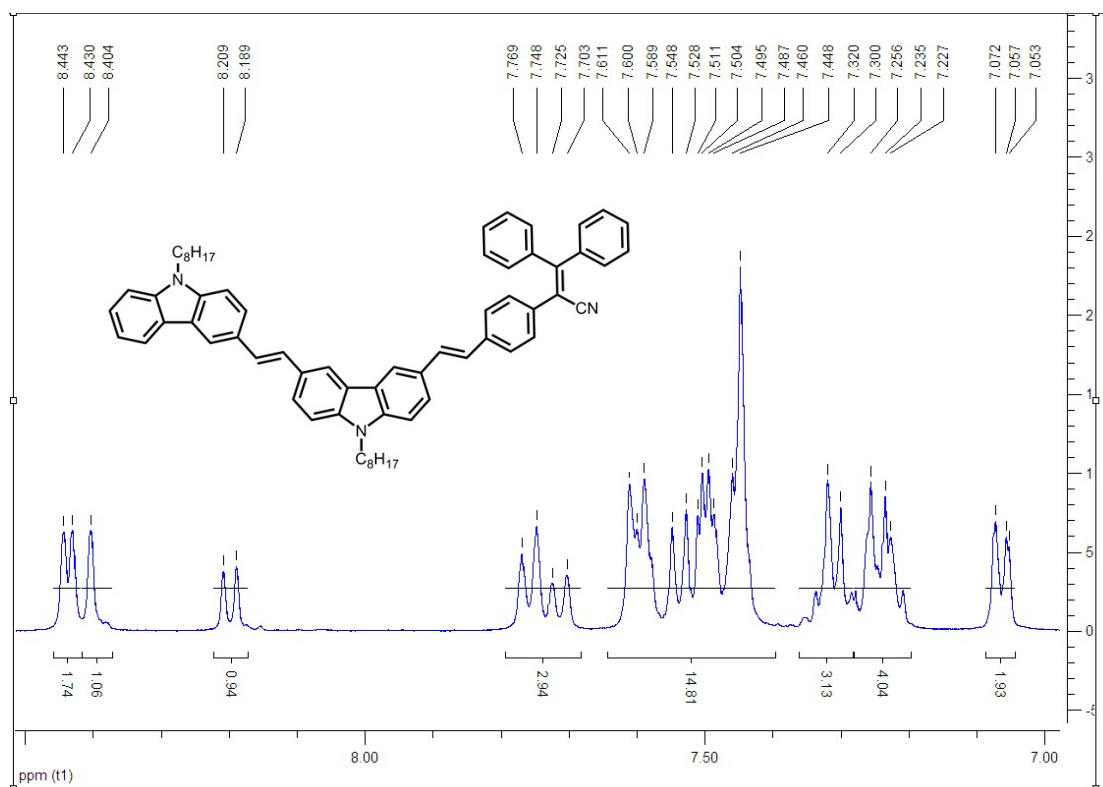

**Fig. S4**  $^1H$ -NMR (400 MHz,  $DMSO-d_6$ ) spectra of compound **Cz2-TPAN**.

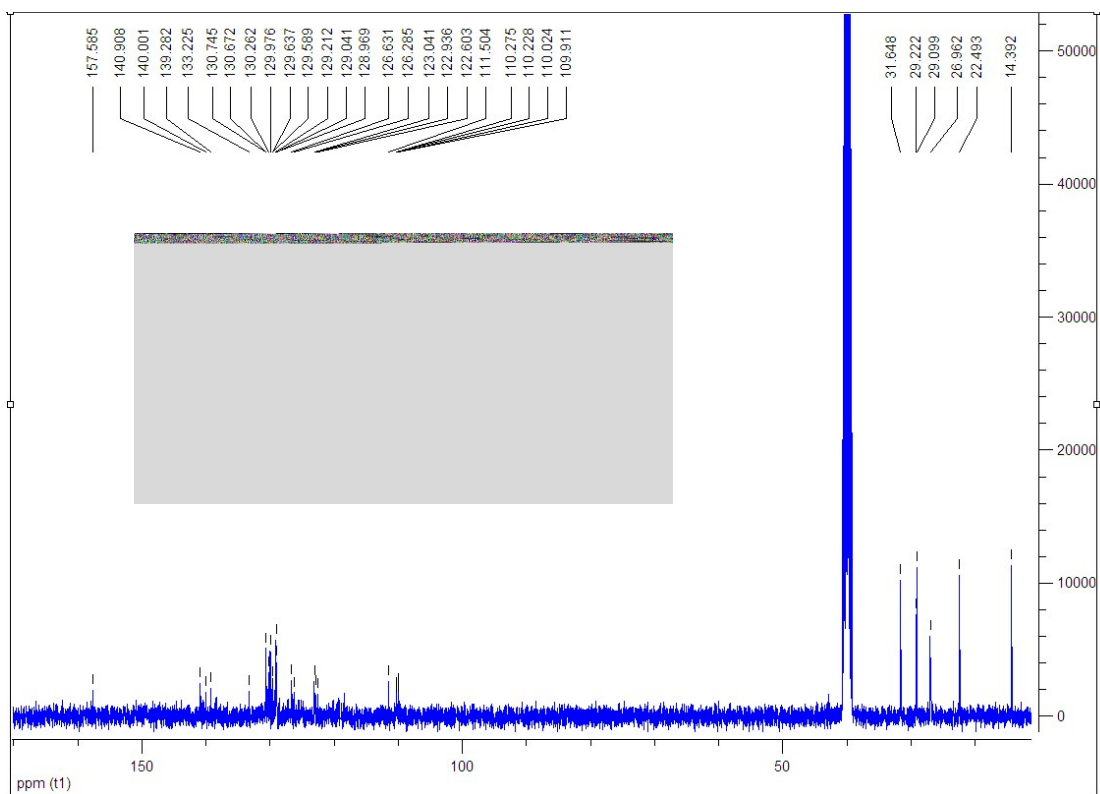

**Fig. S5**  $^{13}\text{C}$ -NMR (100 MHz,  $\text{DMSO-d}_6$ ) spectrum of compound **Cz2-TPAN**.

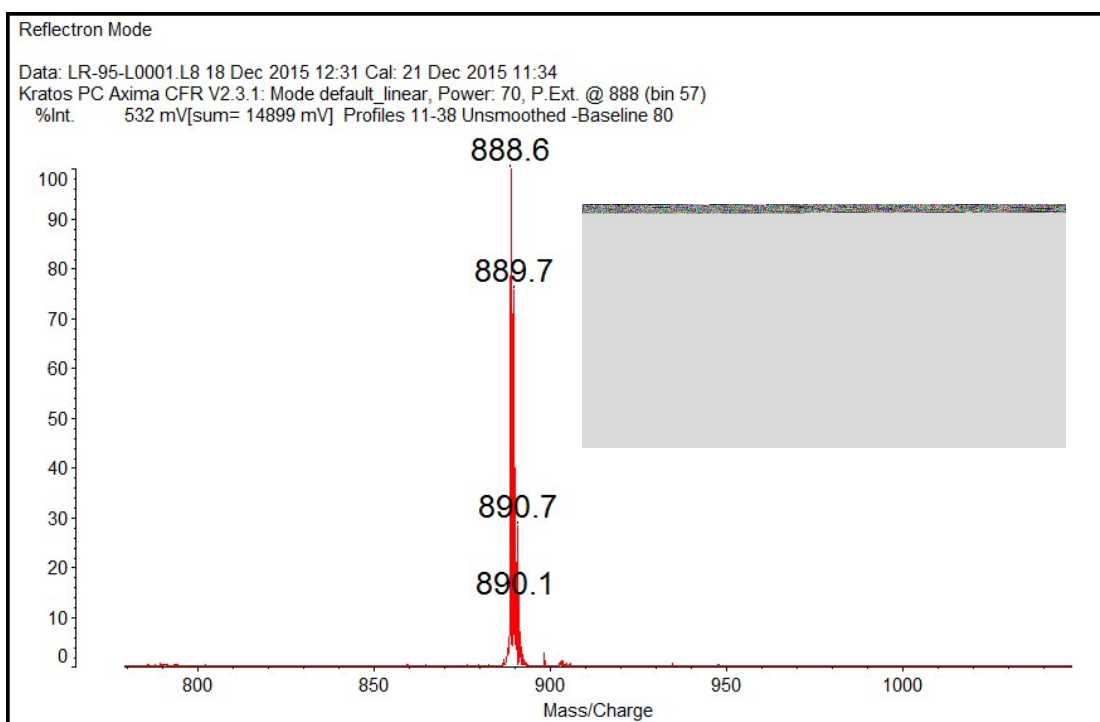

**Fig. S6** The MALDI/TOF MS spectrum of compound **Cz2-TPAN**.

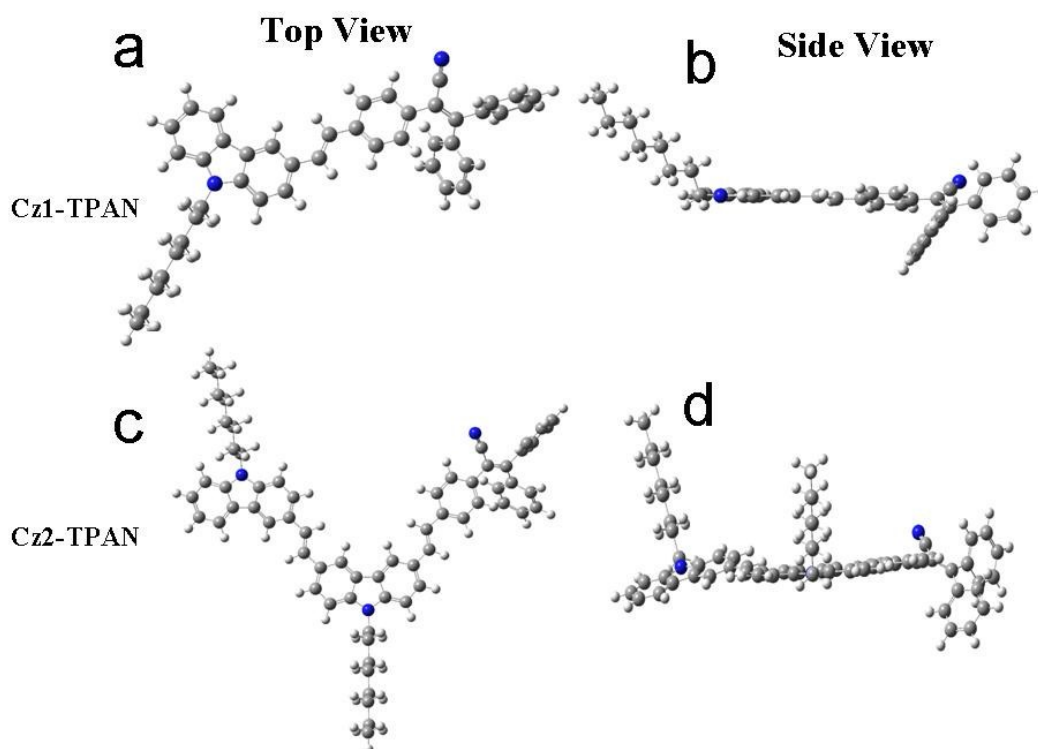

**Fig. S7** The optimized molecular configurations of **Cz1-TPAN** (a, b) and **Cz2-TPAN** (c, d) in two different views calculated by the DFT method (B3LYP/6-31G level) on Gaussian 09 software.

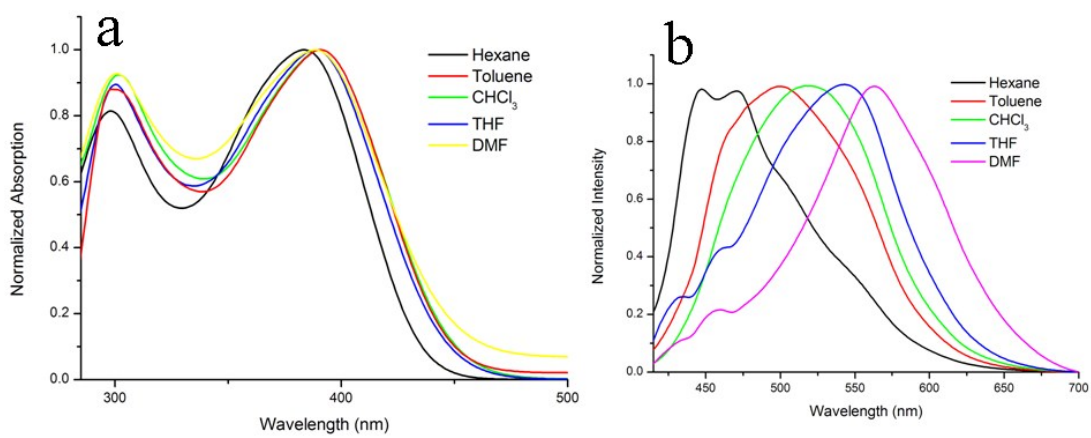

**Fig. S8** Normalized UV-vis absorption (a) and fluorescence emission (b,  $\lambda_{\text{ex}} = 400 \text{ nm}$ ) spectra of **Cz1-TPAN** in different solvents ( $2.0 \times 10^{-5} \text{ M}$ ).

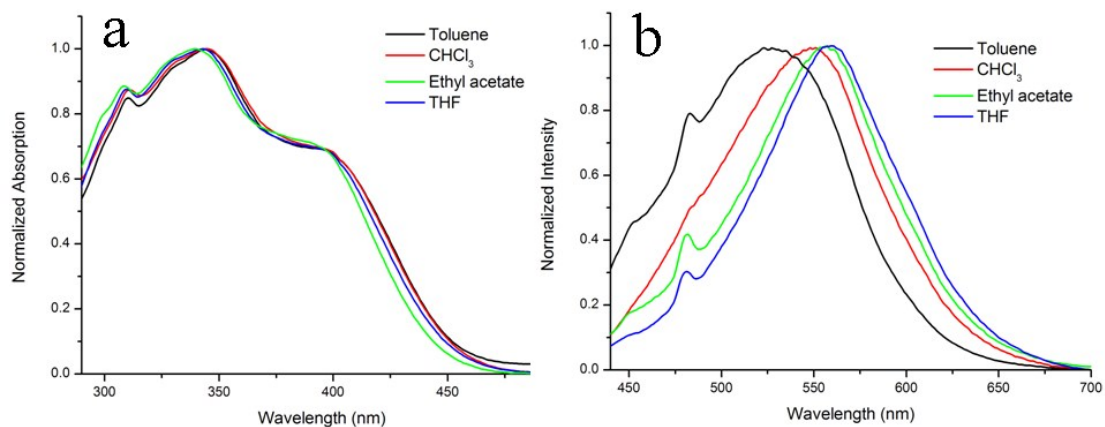

**Fig. S9** Normalized UV-vis absorption (a) and fluorescence emission (b,  $\lambda_{\text{ex}} = 420 \text{ nm}$ ) spectra of **Cz2-TPAN** in different solvents ( $2.0 \times 10^{-5} \text{ M}$ ).

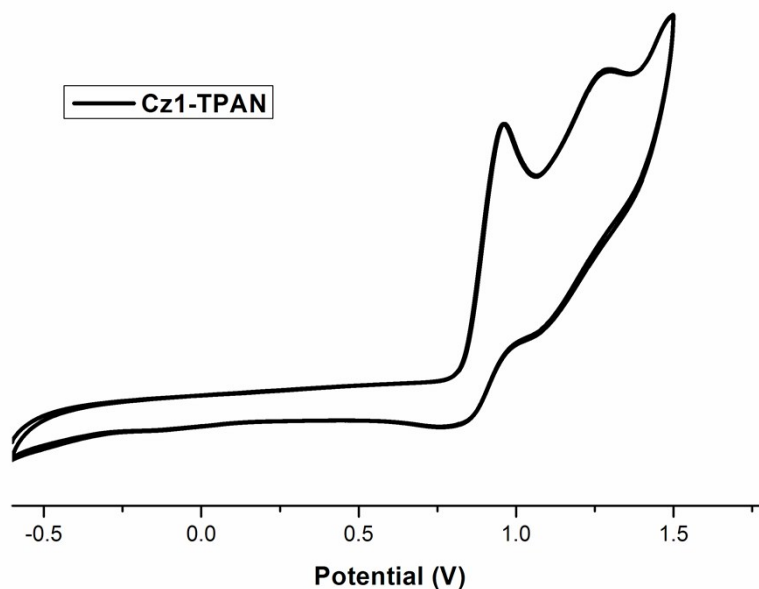

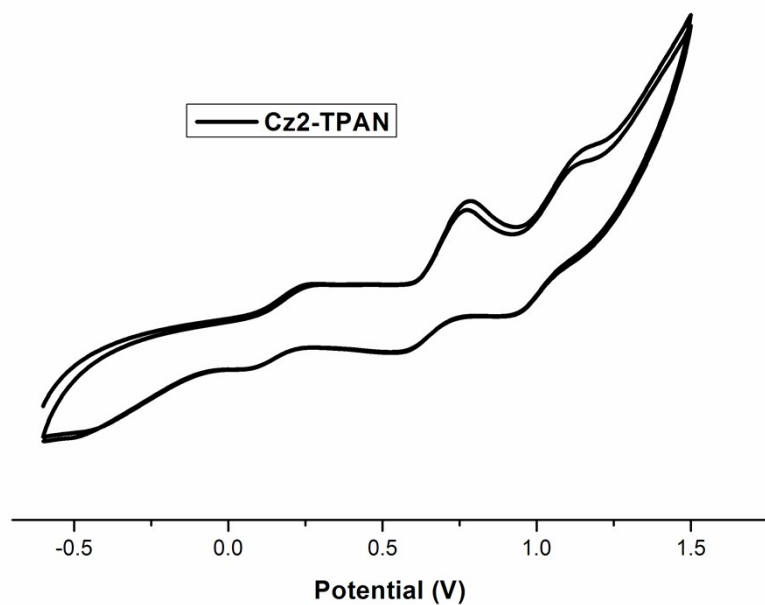

**Fig. S10** Cyclic voltammety diagrams of **Cz1-TPAN** and **Cz2-TPAN** in anhydrous  $\text{CH}_2\text{Cl}_2$  with 0.1 M  $\text{Bu}_4\text{NPF}_6$  as electrolyte at a scan rate of 50 mV/s.

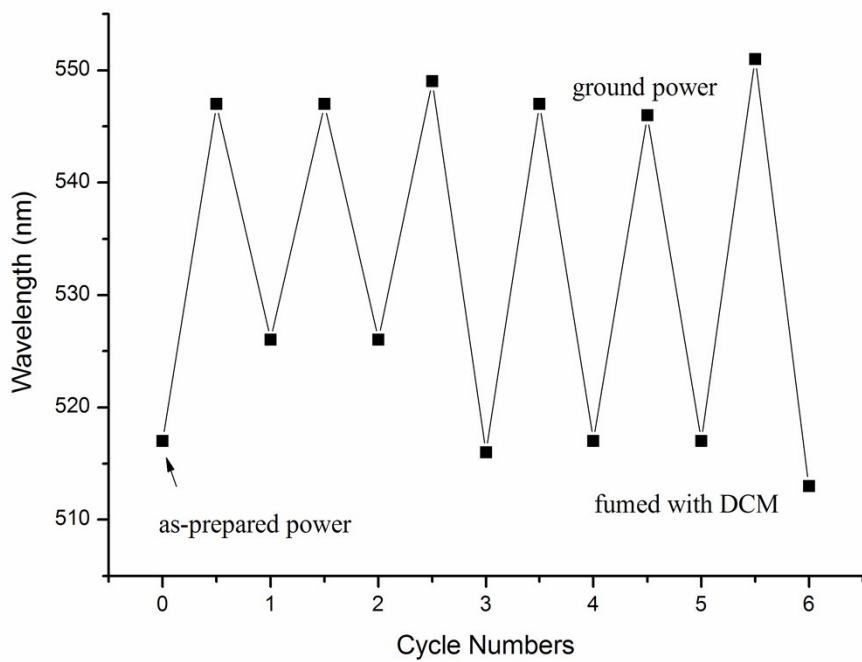

**Fig. S11** Maximum fluorescent emission of **Cz1-TPAN** upon repeating treatment of grinding and fuming with DCM.



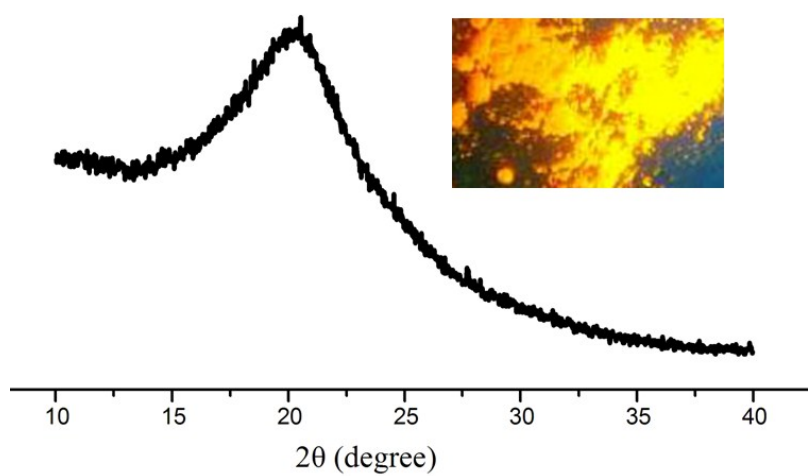

**Fig. S12** XRD patterns of **Cz2-TPAN** in as-synthesized solid states. Inset is photographs in as-synthesized solid states under UV illumination.

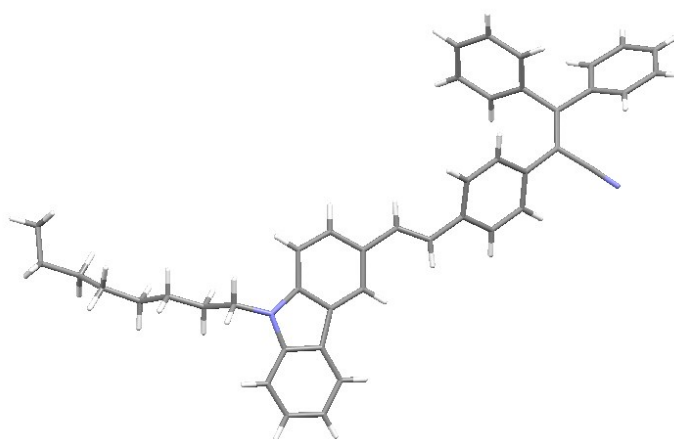

**Fig. S13** The structure of **Cz1-TPAN** in single crystal.

**Table S1** Electrochemical data and HOMO/LUMO energy levels of **Cz1-TPAN** and **Cz2-TPAN**.

| Compounds       | $E_{1/2}^{oxa}$<br>(V) | HOMO <sup>b</sup><br>(eV) | LUMO <sup>b</sup><br>(eV) | $E_g^c$<br>(eV) | HOMO <sup>d</sup><br>(eV) | LUMO <sup>d</sup><br>(eV) |
|-----------------|------------------------|---------------------------|---------------------------|-----------------|---------------------------|---------------------------|
| <b>Cz1-TPAN</b> | 0.88                   | -5.29                     | -2.51                     | 2.78            | -5.02                     | -1.94                     |
| <b>Cz2-TPAN</b> | 0.68                   | -5.09                     | -2.35                     | 2.74            | -4.71                     | -1.94                     |

<sup>a</sup>  $E_{1/2}^{ox}$  = first half-wave potential; Fc/ Fc<sup>+</sup> was used as the external reference. <sup>b</sup> calculated using the empirical equation:  $E_{HOMO} = -(E_{1/2}^{ox} + 4.41)$  and  $E_{LUMO} = E_{HOMO} + E_g$ . <sup>c</sup> Estimated from the onset of the absorption spectra ( $E_g = 1240/\lambda_{onset}$ ). <sup>d</sup> Obtained from quantum chemical calculation using TDDFT/B3LYP/ 6-31G(d).
